# Supplementary material
Source: HighWire-hosted journal article supplement (https://bmjopen.bmj.com/content/6/4/e010365)
Supplement: inline-supplementary-material-1 [file inline-supplementary-material-1.pdf]

Código del paciente: \_\_\_\_\_  
Fecha de Entrevista: \_\_\_/\_\_\_/\_\_\_ Iniciales del Entrevistador: \_\_\_\_\_

Entrevistador: \_\_\_\_\_

### **Cuestionario Inicial Para Todos Los Participantes:**

#### Datos Demográficos:

1. Edad: \_\_\_\_\_
2. Sexo: \_\_\_\_\_

#### Antecedentes:

3. ¿Cuántas personas normalmente duermen en casa?: \_\_\_\_\_ Personas
4. ¿Cuántas habitaciones hay en su hogar? (sin contar baño, pasadizo, cocina, depósito, garaje): \_\_\_\_\_ habitaciones.
5. ¿Cuál es el ingreso mensual de la vivienda? S/. \_\_\_\_\_
6. ¿Cuánto gasta su familia en alimentación cada semana? S/. \_\_\_\_\_
7. ¿Cuántas personas en su vivienda comen de esos alimentos que compran semanalmente? \_\_\_\_\_ Personas
8. ¿Cuántas veces en el ultimo mes usted se ha acostado con bastante hambre porque no había comida en casa? \_\_\_\_\_ días

#### Historia de Tuberculosis:

La tuberculosis es una enfermedad que se trata con varios antibióticos a la vez, y cuyo tratamiento dura varios meses.

9. ¿Ha sido diagnosticado con TBC anteriormente?
  - a. Si
  - b. No → *Pase a la pregunta 15*
  - c. NS
10. ¿Cuántas veces? \_\_\_\_\_
11. Si recibió tratamiento para la TBC, ¿dónde recibió la mayor parte del tratamiento?
  - a. NA
  - b. Mismo distrito
  - c. Otro distrito
  - d. Otra ciudad
  - e. Otro país
12. Si recibió tratamiento para la TBC ¿por cuantos meses en total lo tomó? \_\_\_\_\_
13. Si recibió tratamiento previo, en que esquema estaba (lo mas recién): - \_\_\_\_\_

14. Si recibió tratamiento para la TBC ¿cumplió con el tratamiento previo?
  - a. NA
  - b. Si
  - c. No → \_\_\_\_\_
  - d. NS

#### Factores de Riesgo

15. ¿Ha compartido un cuarto con alguien que haya tenido TBC comprobada?
  - a. Si, y esta persona también tenía una tos persistente
  - b. Si, pero esta persona concurrente no tenía una tos persistente
  - c. No → *Pase a la pregunta 18*
  - d. NS
16. ¿Dónde compartió este ambiente con alguien infectado con TBC?
  - a. NA
  - b. Trabajo
  - c. Casa
  - d. Hospital
  - e. Otro: \_\_\_\_\_
17. ¿Por cuantos días compartió este ambiente con la persona con TBC comprobada? \_\_\_\_\_
18. Aparte de usted, ¿alguien mas en casa esta actualmente recibiendo medicinas para la TBC?
  - a. Si → Quien: \_\_\_\_\_
  - b. No
  - c. NS

#### Creencias y Conocimiento de la Enfermedad

19. ¿Dónde escuchó de la TBC por primera vez?
  - a. Familia
  - b. Amigos
  - c. Colegio
  - d. Puesto de Salud
  - e. TV
  - f. Radio
  - g. NS
20. ¿Puede alguien con TBC y tos infectar a sus familiares?
  - a. Si
  - b. No
  - c. NS

Código del paciente: \_\_\_\_\_

Fecha de Entrevista: \_\_\_/\_\_\_/\_\_\_ Iniciales del Entrevistador: \_\_\_\_\_

21. ¿Qué tan contagiosa cree que es la TBC?
- a. Nada
  - b. Poquito
  - c. Mucho
  - d. Bastante
  - e. Lo mas
22. ¿Qué tan seria cree que es la TBC?
- a. Nada
  - b. Poquito
  - c. Mucho
  - d. Bastante
  - e. Lo mas
23. En general, ¿qué puede hacer uno por si mismo para protegerse de contraer la TBC? [Marcar el factor más importante, no sugerir repuestas].
- a. Vacunarse
  - b. Comer
  - c. Dormir bien, descansar
  - d. Vivir una vida ordenada
  - e. Mantenerse alejado de la gente con TBC
  - f. Educarse
  - g. Otro: \_\_\_\_\_
  - h. NS
24. ¿Cuales son los síntomas de la TBC? [Marcar los factores, no sugerir repuestas].
24. Tos mencionada Si  No
25. Hemoptysis mencionada Si  No
26. Fiebre mencionada Si  No
27. Baja de peso mencionada Si  No
28. Fatiga, decaimiento mencionada Si  No
29. Palidez, un cierto semblante mencionada Si  No
30. ¿Qué debe hacer una persona con TBC para mejorarse? [Marcar el factor más importante, no sugerir repuestas].
- a. Tomar sus medicinas, asistir a controles
  - b. Comer mas, comer mejor
  - c. Descansar
  - d. Tener fe
  - e. Abrigarse
  - f. Otro: \_\_\_\_\_
  - g. NS
31. ¿Cómo puede hacer una persona con TBC para no contagiar la TBC a otros? [Marcar el factor más importante, no sugerir repuestas].
- a. Cubrirse la boca al toser
  - b. Quedarse en casa, mantenerse alejado
  - c. Seguir el tratamiento
  - d. Separar cubiertos
  - e. Otro: \_\_\_\_\_
  - f. NS
32. ¿Se puede curar la TBC?
- a. Siempre
  - b. Normalmente sí
  - c. A veces
  - d. Raramente
  - e. Nunca

**Instrucciones:** Marque una X sobre la línea la posición que escoges.

Ejemplo: -----

33. Con que frecuencia esta tosiendo hoy, en un promedio de 24 horas?

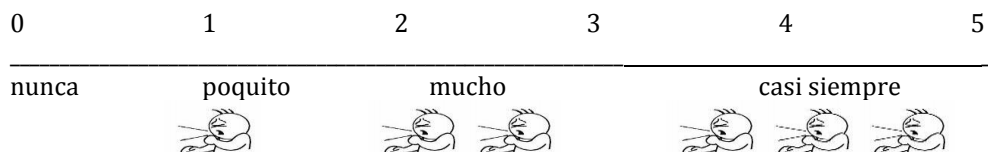

**Instrucciones:** Marque una X, en el cuadrado, todas las alternativas que corresponden.

Ejemplo:

34. Que indicadores utilizó para escoger a que posición poner sus X?

Los números: 1, 2, 3, 4, 5

Las palabras: nunca, poquito, mucho, casi siempre

Las figuras: 

Cuestionario Inicial Para Todos Los Participantes

2

La asociación de la frecuencia de la tos con la dinámica microbiológica de la tuberculosis en pacientes con tuberculosis pulmonar activa.

Código del paciente: \_\_\_\_\_

Fecha de Entrevista: \_\_\_/\_\_\_/\_\_\_ Iniciales del Entrevistador: \_\_\_\_\_

**Instrucciones:** Marque con X la alternativa que corresponde.

Ejemplo:

35. ¿Comparado con hace tres días, tiene más frecuencia de tos el día de hoy?

- a.  Tosiendo ahora menos
- b.  Tosiendo ahora igual
- c.  Tosiendo ahora más

37. Si tiene tos, ¿a que hora en el día tiene más frecuencia: *mañana, tarde o noche*?

- a.  Mañana
- b.  Tarde
- c.  Noche

36. El día de hoy, ¿ha tenido *solo tos, tos con flema o solo flema*?

- a.  Solo tos
- b.  Tos con flema
- c.  Solo flema

38. Qué tan frecuentemente tose?

- a.  Cada pocos segundos
- b.  Cada pocos minutos
- c.  Cada pocas horas
- d.  No tose

**Instrucciones:** Marque el numero de días en total que tiene los siguientes síntomas desde que se enfermó. Marque 0 si ningún día.

39. ¿Cuántos días usted ha tenido los siguientes síntomas?

- a. Tos seca \_\_\_\_\_
- b. Tos con flema \_\_\_\_\_
- c. Tos con sangre \_\_\_\_\_
- d. Fiebre \_\_\_\_\_
- e. Falta de aire \_\_\_\_\_
- f. Pérdida de peso \_\_\_\_\_
- g. Cansancio o decaimiento \_\_\_\_\_
- h. Sudor nocturno \_\_\_\_\_
- i. Falta de apetito \_\_\_\_\_

**Instrucciones:** Responde a la pregunta en el lugar indicado.

40. Actualmente, ¿como se siente? (0 = mal, 10 = bien): \_\_\_\_\_

41. Cuando tiene tos, ¿cuántas toses tiene por hora? \_\_\_\_\_

42. Preguntas sobre VIH

|                                         | Manifiesto del paciente | Historia clínica |
|-----------------------------------------|-------------------------|------------------|
| a. Usted ha sido diagnosticado por VIH? | _____                   | _____            |
| b. Fecha de Diagnostico:                | _____                   | _____            |
| c. Ultima Carga Viral:                  | _____                   | _____            |
| d. Fecha de ultima Carga Viral:         | _____                   | _____            |
| e. Ultimo resultado CD4:                | _____                   | _____            |
| f. Fecha de Ultimo resultado CD4:       | _____                   | _____            |
| g. Tiempo tomanda TARGA (años)          | _____                   | _____            |
